# Supplementary material for: How fast is fisheries-induced evolution? Quantitative analysis of modelling and empirical studies
Source: PubMed Central journal article supplement (PMC3684740; doi:10.1111/eva.12044), 2013-01-24

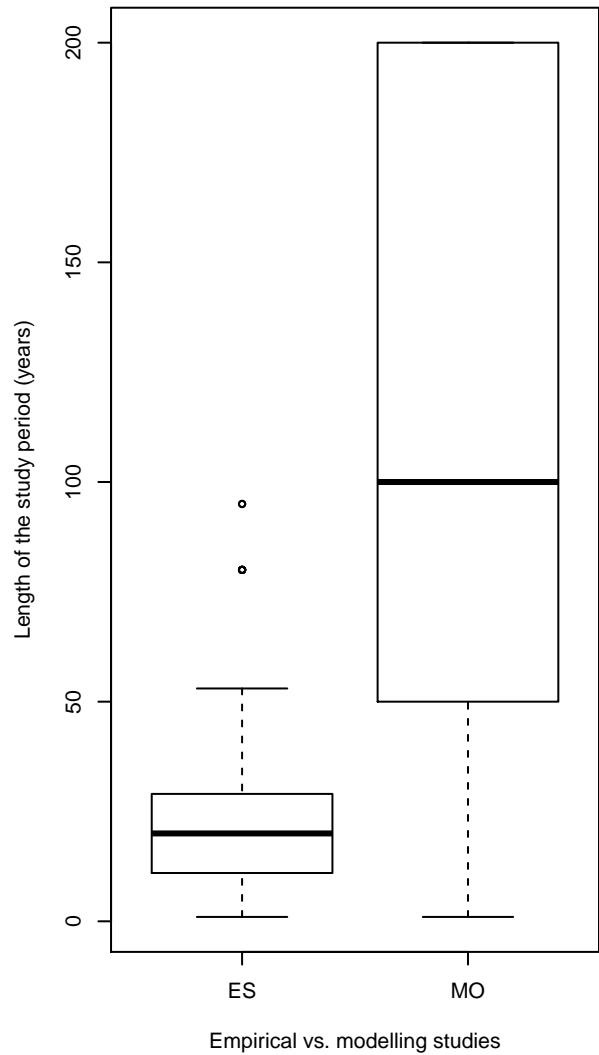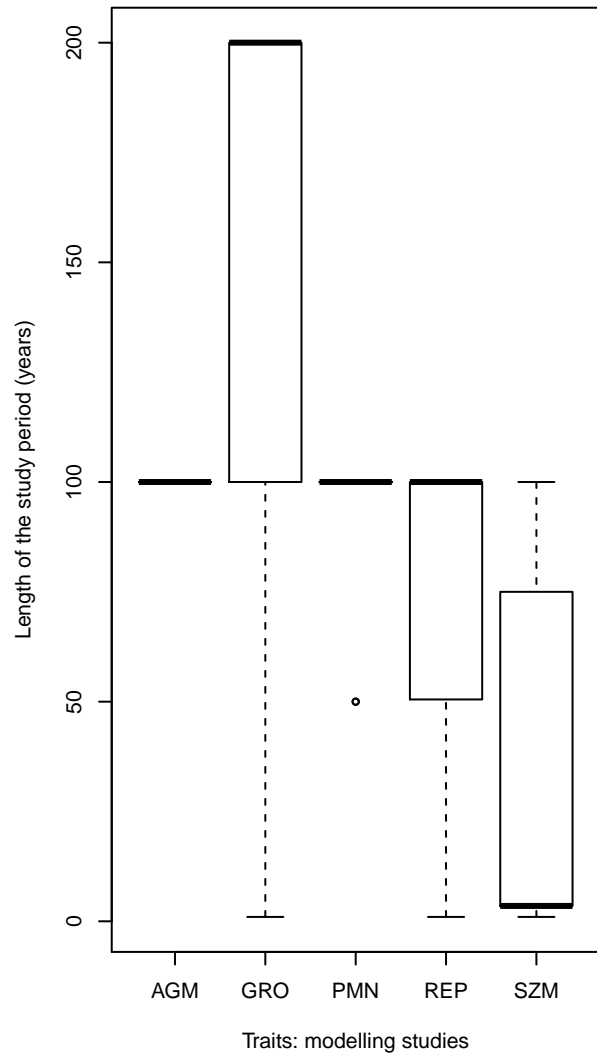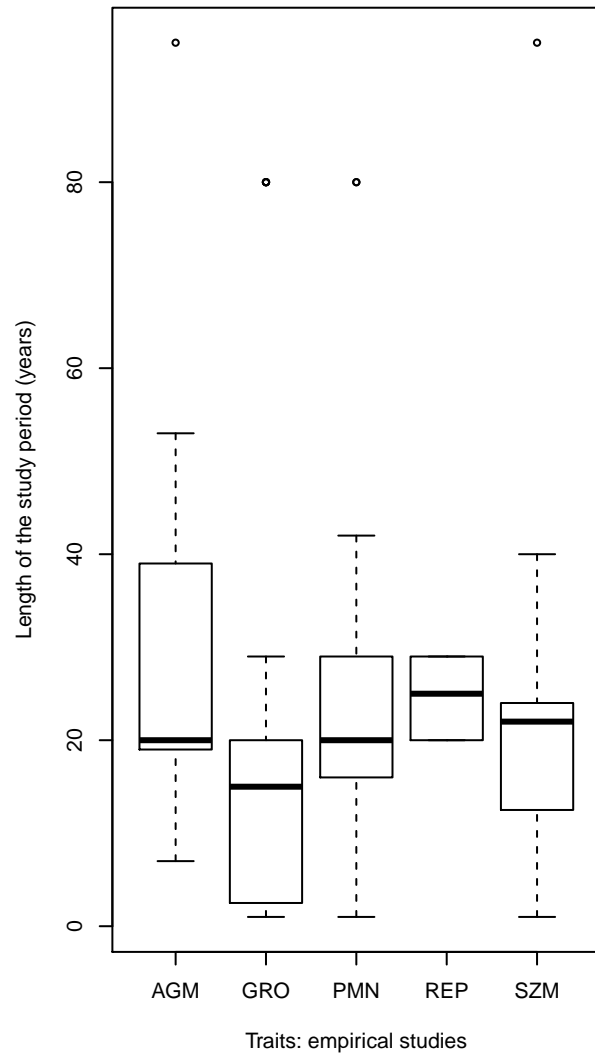

Supplement: eva0006-0585-SD1.pdf [file eva0006-0585-SD1.pdf]
